# Supplementary material for: Unmanaged Pharmacogenomic and Drug Interaction Risk Associations with Hospital Length of Stay among Medicare Advantage Members with COVID-19: A Retrospective Cohort Study
Source: MDPI journal article supplement (doi:10.3390/jpm11111192), 2021-11-12
Supplement: s1 [file s1]

## Supplementary Tables

Table S1: Frequently prescribed drugs with moderate or high PIP among Medicare Advantage members hospitalized with COVID-19.

Table S2: Distribution of length of stay among Medicare Advantage members hospitalized with COVID-19 by pharmacogenomic risk and drug-drug interaction.

Table S3: Length-of-stay ratios of covariates in the baseline ZTNB regression model.

Table S4: Distribution of patients by HCC count subpopulation, PIP, and DDI category.

Tables S5–S9: Summary Tables for HCC Count Subpopulation Models:

- Table S5. Length-of-stay ratios in the ZTNB regression model for all Medicare Advantage members hospitalized with COVID-19.
- Table S6. Expected length-of-stay ratios in the ZTNB regression model for patients with zero or one HCC.
- Table S7. Expected length-of-stay ratios in the ZTNB regression model for patients with two or three HCC.
- Table S8. Expected length-of-stay ratios in the ZTNB regression model for patients with four or five HCC.
- Table S9. Expected length-of-stay ratios in the ZTNB regression model for patients with six or more HCC.

Table S10. Distribution of patients by chronic condition subpopulation, pharmacogenomic risk, and drug-drug interaction risk.

Tables S11–S14: Summary Tables for Chronic Conditions Subpopulation Models:

- Table S11. Expected length-of-stay ratios in the ZTNB regression model for patients with COPD.
- Table S12. Expected length-of-stay ratios in the ZTNB regression model for patients with diabetes.
- Table S13. Expected length-of-stay ratios in the ZTNB regression model for patients with hyperlipidemia.
- Table S14. Expected length-of-stay ratios in the ZTNB regression model for patients with hypertension.

**Table S1.** Frequently prescribed drugs with moderate or high PIP among Medicare Advantage members hospitalized with COVID-19.

| Generic Name | Drug Class                              | Minimum patient PIP associated with drug | Frequency, No. (%) |
|--------------|-----------------------------------------|------------------------------------------|--------------------|
| Metoprolol   | Beta blockers                           | 46%                                      | 1422 (24%)         |
| Pantoprazole | Proton-pump inhibitors                  | 29%                                      | 730 (12%)          |
| Omeprazole   | Proton-pump inhibitors                  | 30%                                      | 571 (9%)           |
| Escitalopram | Selective serotonin-reuptake Inhibitors | 33%                                      | 365 (6%)           |
| Citalopram   | Selective serotonin-reuptake Inhibitors | 32%                                      | 207 (3%)           |

PIP: pharmacogenetic interaction probability.

**Table S2.** Distribution of length of stay among Medicare Advantage members hospitalized with COVID-19 by pharmacogenomic risk and drug-drug interaction.

| Medication risk measure | Pharmacogenomic risk category       | LOS (days), Mean (95% CI) | LOS (days) Median |
|-------------------------|-------------------------------------|---------------------------|-------------------|
| PIP                     | Low ( $\leq 25\%$ )                 | 12.0 (11.6–12.4)          | 8                 |
|                         | Moderate (26%–50%)                  | 13.2 (12.7–13.7)          | 9                 |
|                         | High ( $> 50\%$ )                   | 13.8 (13–14.6)            | 9                 |
| DDI                     | Minimal or minor                    | 12.4 (12–12.8)            | 8                 |
|                         | Moderate, major, or contraindicated | 12.7 (12.3–13.1)          | 8                 |

The average LOS (in days) for each unique DDI severity category were minimal: 12.0 for minimal DDI, 12.5 for minor DDI, 13.1 for moderate DDI, 12.6 for major DDI, and 12.6 for contraindicated DDI. LOS: length of stay; PIP: pharmacogenetic interaction probability; DDI: drug-drug interaction.

**Table S3.** Length-of-stay ratios of covariates in the ZTNB baseline model.

| Variable                                             | Rate Ratio (95% CI)  | p-value |
|------------------------------------------------------|----------------------|---------|
| Moderate PIP (26% – 50%) <sup>a</sup>                | 1.09 (1.04, 1.15)    | <0.001  |
| High PIP ( $> 50\%$ ) <sup>a</sup>                   | 1.16 (1.08, 1.24)    | <0.001  |
| Moderate, major, or contraindicated DDI <sup>b</sup> | 1.02 (0.98, 1.06)    | 0.384   |
| Age                                                  | 1.005 (1.003, 1.007) | <0.001  |
| Gender <sup>c</sup>                                  | 1.08 (1.03, 1.13)    | 0.001   |

<sup>a</sup>Low PIP (0–25%) as baseline; <sup>b</sup>Minimal or minor DDI as baseline; <sup>c</sup>female as baseline. ZTNB: zero-truncated negative binomial; PIP: pharmacogenetic interaction probability; DDI: drug-drug interaction.

**Table S4.** Distribution of patients by HCC count subpopulation, pharmacogenomic risk, and drug-drug interaction categories.

| HCC Count | Patients, No. (%) | No. of patients by PIP |                    |                   | No. of patients by DDI |                                     |
|-----------|-------------------|------------------------|--------------------|-------------------|------------------------|-------------------------------------|
|           |                   | Low ( $\leq 25\%$ )    | Moderate (26%–50%) | High ( $> 50\%$ ) | Minimal or minor       | Moderate, major, or contraindicated |
| 0 or 1    | 1460 (24.2)       | 989                    | 377                | 94                | 954                    | 506                                 |
| 2 or 3    | 1991 (33.1)       | 1245                   | 542                | 204               | 1083                   | 908                                 |
| 4 or 5    | 1182 (19.6)       | 597                    | 388                | 197               | 519                    | 663                                 |
| 6 or more | 1392 (23.1)       | 683                    | 477                | 232               | 554                    | 838                                 |

HCC: hierarchical conditions categories; PIP: pharmacogenomic interaction probability; DDI: drug-drug interaction.

**Table S5.** Length-of-stay ratios in the ZTNB regression model for all Medicare Advantage members hospitalized with COVID-19.

| Variable                           | Description                                                               | Ratio | 95% C.I.       | p-value |
|------------------------------------|---------------------------------------------------------------------------|-------|----------------|---------|
| (Intercept)                        | Intercept                                                                 | 7.12  | (5.41, 9.37)   | <0.001  |
| Moderate PIP <sup>a</sup>          | 26 to 50%                                                                 | 1.09  | (1.04, 1.14)   | <0.001  |
| High PIP <sup>a</sup>              | > 50%                                                                     | 1.16  | (1.09, 1.24)   | <0.001  |
| DDI Category 1 <sup>b</sup>        | Moderate, major, or contraindicated                                       | 1.04  | (1.00, 1.09)   | 0.066   |
| Age                                | Age of a patient (2019)                                                   | 1.007 | (1.004, 1.009) | <0.001  |
| Income                             | Median household income per ZCTA level (standardized)                     | 1.06  | (1.04, 1.09)   | <0.001  |
| RAF Score                          | Risk adjustment factor score                                              | 1.02  | (1.00, 1.04)   | 0.108   |
| D-SNP                              | Enrolled for at least one month in the dual — eligible special needs plan | 0.93  | (0.85, 1.02)   | 0.136   |
| I-SNP                              | Enrolled for at least one month in the institutional special needs plan   | 0.73  | (0.70, 0.77)   | <0.001  |
| Gender <sup>c</sup>                | Gender of a patient                                                       | 1.05  | (1.00, 1.10)   | 0.027   |
| Race/ethnicity Code 1 <sup>d</sup> | White (non-Hispanic)                                                      | 0.97  | (0.77, 1.21)   | 0.769   |
| Race/ethnicity Code 2 <sup>d</sup> | Black (non-Hispanic)                                                      | 0.97  | (0.77, 1.22)   | 0.806   |
| Race/ethnicity Code 3 <sup>d</sup> | Other                                                                     | 1.03  | (0.79, 1.33)   | 0.845   |
| Race/ethnicity Code 4 <sup>d</sup> | Asian/Pacific Islander                                                    | 0.89  | (0.68, 1.18)   | 0.426   |
| Race/ethnicity Code 5 <sup>d</sup> | Hispanic/Latino                                                           | 0.90  | (0.70, 1.16)   | 0.430   |
| HCC009                             | Lung and other severe cancers                                             | 0.76  | (0.64, 0.90)   | 0.002   |
| HCC017                             | Diabetes with acute complications                                         | 0.88  | (0.74, 1.05)   | 0.160   |
| HCC023                             | Other significant endocrine and metabolic disorders                       | 0.92  | (0.84, 1.01)   | 0.079   |
| HCC027                             | End-stage liver disease                                                   | 1.38  | (1.04, 1.82)   | 0.026   |
| HCC033                             | Intestinal obstruction/perforation                                        | 1.05  | (0.93, 1.19)   | 0.443   |
| HCC039                             | Bone/joint/muscle infections/necrosis                                     | 1.14  | (1.00, 1.30)   | 0.051   |

|        |                                                                             |      |              |        |
|--------|-----------------------------------------------------------------------------|------|--------------|--------|
| HCC046 | Severe hematological disorders                                              | 0.73 | (0.57, 0.94) | 0.013  |
| HCC047 | Disorders of immunity                                                       | 0.92 | (0.79, 1.07) | 0.269  |
| HCC048 | Coagulation defects and other specified hematological disorders             | 1.06 | (0.97, 1.15) | 0.192  |
| HCC054 | Substance use with psychotic complications                                  | 1.27 | (0.92, 1.74) | 0.147  |
| HCC055 | Substance use disorder, moderate/severe or substance use with complications | 1.08 | (0.95, 1.23) | 0.234  |
| HCC057 | Schizophrenia                                                               | 1.13 | (1.02, 1.25) | 0.018  |
| HCC072 | Spinal cord disorders/injuries                                              | 1.18 | (0.97, 1.44) | 0.106  |
| HCC073 | Amyotrophic lateral sclerosis and other motor neuron disease                | 1.28 | (0.71, 2.30) | 0.416  |
| HCC077 | Multiple sclerosis                                                          | 1.41 | (1.20, 1.66) | <0.001 |
| HCC082 | Respirator dependence/ tracheostomy status                                  | 1.22 | (0.96, 1.56) | 0.101  |
| HCC084 | Cardio-respiratory failure and shock                                        | 1.07 | (0.98, 1.16) | 0.124  |
| HCC099 | Cerebral hemorrhage                                                         | 1.09 | (0.91, 1.31) | 0.324  |
| HCC103 | Hemiplegia/hemiparesis                                                      | 1.06 | (0.97, 1.15) | 0.195  |
| HCC104 | Monoplegia, other paralytic syndromes                                       | 0.63 | (0.43, 0.94) | 0.022  |
| HCC107 | Vascular disease with complications                                         | 1.10 | (0.99, 1.23) | 0.088  |
| HCC112 | Fibrosis of lung and other chronic lung disorders                           | 0.69 | (0.54, 0.89) | 0.004  |
| HCC114 | Aspiration and specified bacterial pneumonias                               | 1.02 | (0.90, 1.15) | 0.758  |
| HCC115 | Pneumococcal pneumonia, empyema, lung abscess                               | 0.91 | (0.80, 1.05) | 0.191  |
| HCC134 | Dialysis status                                                             | 0.91 | (0.80, 1.05) | 0.194  |
| HCC135 | Acute renal failure                                                         | 1.01 | (0.95, 1.09) | 0.684  |
| HCC137 | Chronic kidney disease, severe (stage 4)                                    | 0.83 | (0.69, 1.00) | 0.046  |
| HCC161 | Chronic ulcer of skin, except pressure                                      | 1.07 | (0.98, 1.17) | 0.144  |
| HCC169 | Vertebral fractures without spinal cord injury                              | 1.13 | (0.96, 1.32) | 0.149  |

|        |                                         |      |              |       |
|--------|-----------------------------------------|------|--------------|-------|
| HCC170 | Hip fracture/dislocation                | 1.23 | (1.09, 1.38) | 0.001 |
| HCC173 | Traumatic amputations and complications | 1.16 | (0.94, 1.43) | 0.171 |

<sup>a</sup>0–25% PPI as baseline; <sup>b</sup>minimal or minor DDI as baseline; <sup>c</sup>female as baseline; <sup>d</sup>unknown race/ethnicity as baseline. Significance was set at  $p < 0.05$ . Variables shown were determined by least absolute shrinkage and selection operator analysis, which can vary by cohort subgroup. ZTNB: zero-truncated negative binomial; HCC: hierarchical conditions categories. PIP: pharmacogenomic interaction probability; DDI: drug-drug interaction; D-SNP: dual special needs plan; I-SNP: institutional special needs plan.

**Table S6.** Expected length-of-stay ratios in the ZTNB regression model for patients with zero or one HCC.

| Variable                           | Description                                                                              | Ratio | 95% C.I.       | <i>p</i> -value |
|------------------------------------|------------------------------------------------------------------------------------------|-------|----------------|-----------------|
| (Intercept)                        | Intercept                                                                                | 4.93  | (2.91, 8.34)   | <0.001          |
| Moderate PIP <sup>a</sup>          | 26 to 50%                                                                                | 1.15  | (1.04, 1.28)   | 0.007           |
| High PIP <sup>a</sup>              | >50%                                                                                     | 1.39  | (1.15, 1.67)   | <0.001          |
| DDI Category 1 <sup>b</sup>        | Moderate, major, or contraindicated                                                      | 0.91  | (0.82, 1.00)   | 0.045           |
| Age                                | Age of a patient (2019)                                                                  | 1.015 | (1.010, 1.020) | <0.001          |
| Income                             | Median household income per ZCTA level (standardized)                                    | 1.03  | (0.99, 1.08)   | 0.188           |
| C-SNP                              | Enrolled for at least one month in the chronic or disabling condition special needs plan | 0.89  | (0.68, 1.15)   | 0.372           |
| D-SNP                              | Enrolled for at least one month in the dual — eligible special needs plan                | 0.74  | (0.58, 0.94)   | 0.012           |
| I-SNP                              | Enrolled for at least one month in the institutional special needs plan                  | 0.75  | (0.67, 0.84)   | <0.001          |
| Gender <sup>c</sup>                | Gender of a patient                                                                      | 1.08  | (0.98, 1.19)   | 0.107           |
| Race/ethnicity Code 1 <sup>d</sup> | White (non-Hispanic)                                                                     | 0.73  | (0.50, 1.06)   | 0.101           |
| Race/ethnicity Code 2 <sup>d</sup> | Black (non-Hispanic)                                                                     | 0.69  | (0.47, 1.01)   | 0.059           |
| Race/ethnicity Code 3 <sup>d</sup> | Other                                                                                    | 0.57  | (0.36, 0.88)   | 0.012           |
| Race/ethnicity Code 4 <sup>d</sup> | Asian/Pacific Islander                                                                   | 0.73  | (0.47, 1.14)   | 0.166           |
| Race/ethnicity Code 5 <sup>d</sup> | Hispanic/Latino                                                                          | 0.61  | (0.40, 0.93)   | 0.022           |
| HCC010                             | Lymphoma and other cancers                                                               | 1.36  | (0.72, 2.56)   | 0.338           |

|        |                                                                 |      |              |       |
|--------|-----------------------------------------------------------------|------|--------------|-------|
| HCC012 | Breast, prostate, and other cancers and tumors                  | 0.86 | (0.63, 1.17) | 0.333 |
| HCC022 | Morbid obesity                                                  | 0.87 | (0.59, 1.30) | 0.506 |
| HCC040 | Rheumatoid arthritis and inflammatory connective tissue disease | 1.52 | (1.10, 2.10) | 0.012 |
| HCC057 | Schizophrenia                                                   | 1.50 | (0.97, 2.33) | 0.071 |
| HCC058 | Reactive and unspecified psychosis                              | 1.40 | (1.08, 1.82) | 0.011 |
| HCC077 | Multiple sclerosis                                              | 1.45 | (0.79, 2.63) | 0.227 |
| HCC079 | Seizure disorders and convulsions                               | 0.64 | (0.41, 1.00) | 0.052 |
| HCC085 | Congestive heart failure                                        | 0.88 | (0.65, 1.20) | 0.422 |
| HCC115 | Pneumococcal pneumonia, empyema, lung abscess                   | 2.62 | (1.33, 5.17) | 0.005 |
| HCC124 | Exudative macular degeneration                                  | 1.15 | (0.67, 1.95) | 0.616 |

<sup>a</sup>0–25% PIP as baseline; <sup>b</sup>minimal or minor DDI as baseline; <sup>c</sup>female as baseline; <sup>d</sup>unknown race/ethnicity as baseline. Significance was set at  $p < 0.05$ . Variables shown were determined by least absolute shrinkage and selection operator analysis, which can vary by cohort subgroup. ZTNB: zero-truncated negative binomial; HCC: hierarchical conditions categories. PIP: pharmacogenomic interaction probability; DDI: drug-drug interaction; C-SNP: chronic condition special needs plan; D-SNP: dual special needs plan; I-SNP: institutional special needs plan.

**Table S7.** Expected length-of-stay ratios in the ZTNB regression model for patients with two or three HCC.

| Variable                           | Description                                                             | Ratio | 95% C.I.       | <i>p</i> -value |
|------------------------------------|-------------------------------------------------------------------------|-------|----------------|-----------------|
| (Intercept)                        | Intercept                                                               | 6.25  | (3.91, 10.01)  | <0.001          |
| Moderate PIP <sup>a</sup>          | 26% to 50%                                                              | 1.03  | (0.95, 1.11)   | 0.522           |
| High PIP <sup>a</sup>              | >50%                                                                    | 1.08  | (0.96, 1.21)   | 0.204           |
| DDI Category 1 <sup>b</sup>        | Moderate, major, or contraindicated                                     | 1.10  | (1.02, 1.18)   | 0.010           |
| Age                                | Age of a patient (2019)                                                 | 1.004 | (1.000, 1.007) | 0.028           |
| Income                             | Median household income per ZCTA level (standardized)                   | 1.07  | (1.03, 1.11)   | <0.001          |
| I-SNP                              | Enrolled for at least one month in the institutional special needs plan | 0.77  | (0.72, 0.83)   | <0.001          |
| Race/ethnicity Code 1 <sup>c</sup> | White (non-Hispanic)                                                    | 1.42  | (0.94, 2.14)   | 0.098           |
| Race/ethnicity Code 2 <sup>c</sup> | Black (non-Hispanic)                                                    | 1.46  | (0.97, 2.21)   | 0.073           |

|                                       |                                                          |      |              |       |
|---------------------------------------|----------------------------------------------------------|------|--------------|-------|
| Race/ethnicity Code<br>3 <sup>c</sup> | Other                                                    | 1.74 | (1.10, 2.76) | 0.018 |
| Race/ethnicity Code 4 <sup>c</sup>    | Asian/Pacific Islander                                   | 1.10 | (0.66, 1.83) | 0.720 |
| Race/ethnicity Code<br>5 <sup>c</sup> | Hispanic/Latino                                          | 1.54 | (0.98, 2.44) | 0.061 |
| HCC018                                | Diabetes with chronic complications                      | 0.92 | (0.86, 1.00) | 0.043 |
| HCC023                                | Other significant endocrine and metabolic disorders      | 0.81 | (0.66, 1.00) | 0.045 |
| HCC054                                | Substance use with psychotic complications               | 1.66 | (0.91, 3.03) | 0.099 |
| HCC058                                | Reactive and unspecified psychosis                       | 1.09 | (0.99, 1.21) | 0.084 |
| HCC072                                | Spinal cord disorders/injuries                           | 1.67 | (1.10, 2.52) | 0.015 |
| HCC084                                | Cardio-respiratory failure and shock                     | 1.40 | (1.03, 1.90) | 0.033 |
| HCC106                                | Atherosclerosis of extremity with ulceration or gangrene | 1.51 | (1.05, 2.17) | 0.025 |
| HCC112                                | Fibrosis of lung and other chronic lung disorders        | 0.46 | (0.27, 0.78) | 0.004 |
| HCC169                                | Vertebral fractures without spinal cord injury           | 1.25 | (0.90, 1.72) | 0.177 |
| HCC170                                | Hip fracture/dislocation                                 | 1.45 | (1.13, 1.85) | 0.003 |

<sup>a</sup>0–25% PIP as baseline; <sup>b</sup>minimal or minor DDI as baseline; <sup>c</sup>unknown race/ethnicity as baseline. Significance was set at  $p < 0.05$ . Variables shown were determined by least absolute shrinkage and selection operator analysis, which can vary by cohort subgroup. ZTNB: zero-truncated negative binomial; HCC: hierarchical condition categories; PIP: pharmacogenomic interaction probability; DDI: drug-drug interaction; I-SNP: institutional special needs plan.

**Table S8.** Expected length-of-stay ratios in the ZTNB regression model for patients with four or five HCC.

| Variable                    | Description                                                             | Ratio | 95% C.I.       | <i>p</i> -value |
|-----------------------------|-------------------------------------------------------------------------|-------|----------------|-----------------|
| (Intercept)                 | Intercept                                                               | 12.97 | (11.92, 14.11) | <0.001          |
| Moderate PIP <sup>a</sup>   | 26 to 50%                                                               | 1.13  | (1.02, 1.25)   | 0.019           |
| High PIP <sup>a</sup>       | >50%                                                                    | 1.13  | (1.00, 1.29)   | 0.057           |
| DDI Category 1 <sup>b</sup> | Moderate, major, or contraindicated                                     | 1.07  | (0.97, 1.17)   | 0.179           |
| Income                      | Median household income per ZCTA level (standardized)                   | 1.05  | (1.01, 1.10)   | 0.021           |
| I-SNP                       | Enrolled for at least one month in the institutional special needs plan | 0.72  | (0.65, 0.79)   | <0.001          |

|        |                                         |      |              |       |
|--------|-----------------------------------------|------|--------------|-------|
| HCC09  | Lung and other severe cancers           | 0.59 | (0.42, 0.83) | 0.002 |
| HCC039 | Bone/joint/muscle infections/necrosis   | 1.65 | (1.22, 2.22) | 0.001 |
| HCC072 | Spinal cord disorders/injuries          | 1.44 | (0.92, 2.28) | 0.114 |
| HCC077 | Multiple sclerosis                      | 1.45 | (1.09, 1.92) | 0.010 |
| HCC173 | Traumatic amputations and complications | 1.35 | (0.85, 2.13) | 0.199 |

<sup>a</sup>0–25% PIP as baseline; <sup>b</sup>minimal or minor DDI as baseline. Significance was set at  $p < 0.05$ . Variables shown were determined by least absolute shrinkage and selection operator analysis, which can vary by cohort subgroup. ZTNB: zero-truncated negative binomial; HCC: hierarchical conditions categories; PIP: pharmacogenomic interaction probability; DDI: drug–drug interaction; I-SNP: institutional special needs plan.

**Table S9.** Expected length-of-stay ratios in the ZTNB regression model for patients with six or more chronic conditions.

| Variable                    | Description                                                             | Ratio | 95% C.I.       | <i>p</i> -value |
|-----------------------------|-------------------------------------------------------------------------|-------|----------------|-----------------|
| (Intercept)                 | Intercept                                                               | 12.37 | (10.54, 14.51) | <0.001          |
| Moderate PIP <sup>a</sup>   | 26% to 50%                                                              | 1.08  | (0.98, 1.18)   | 0.112           |
| High PIP <sup>a</sup>       | >50%                                                                    | 1.16  | (1.03, 1.31)   | 0.014           |
| DDI Category 1 <sup>b</sup> | Moderate, major, or contraindicated                                     | 1.01  | (0.93, 1.11)   | 0.786           |
| Income                      | Median household income per ZCTA level (standardized)                   | 1.08  | (1.03, 1.12)   | <0.001          |
| RAF Score                   | Risk adjustment factor score                                            | 1.02  | (0.99, 1.05)   | 0.239           |
| I-SNP                       | Enrolled for at least one month in the institutional special needs plan | 0.66  | (0.59, 0.73)   | <0.001          |
| Gender <sup>c</sup>         | Gender of a patient                                                     | 1.11  | (1.01, 1.20)   | 0.022           |
| HCC008                      | Metastatic cancer and acute leukemia                                    | 1.26  | (0.99, 1.58)   | 0.056           |
| HCC009                      | Lung and other severe cancers                                           | 0.83  | (0.65, 1.06)   | 0.134           |
| HCC012                      | Breast, prostate, and other cancers and tumors                          | 1.20  | (1.02, 1.41)   | 0.025           |
| HCC023                      | Other significant endocrine and metabolic disorders                     | 0.91  | (0.81, 1.03)   | 0.135           |
| HCC027                      | End-stage liver disease                                                 | 1.34  | (0.98, 1.84)   | 0.069           |
| HCC028                      | Cirrhosis of liver                                                      | 0.75  | (0.56, 1.02)   | 0.064           |
| HCC046                      | Severe hematological disorders                                          | 0.54  | (0.38, 0.76)   | <0.001          |
| HCC054                      | Substance use with psychotic complications                              | 1.35  | (0.88, 2.07)   | 0.173           |



|        |                                                                             |      |              |       |
|--------|-----------------------------------------------------------------------------|------|--------------|-------|
| HCC055 | Substance use disorder, moderate/severe or substance use with complications | 1.11 | (0.95, 1.30) | 0.194 |
| HCC077 | Multiple sclerosis                                                          | 1.37 | (1.06, 1.78) | 0.018 |
| HCC099 | Cerebral hemorrhage                                                         | 1.30 | (1.05, 1.60) | 0.015 |
| HCC108 | Vascular disease                                                            | 0.89 | (0.82, 0.97) | 0.009 |
| HCC112 | Fibrosis of lung and other chronic lung disorders                           | 0.66 | (0.46, 0.95) | 0.025 |
| HCC114 | Aspiration and specified bacterial pneumonias                               | 1.05 | (0.92, 1.19) | 0.479 |
| HCC124 | Exudative macular degeneration                                              | 1.23 | (0.98, 1.55) | 0.073 |
| HCC134 | Dialysis status                                                             | 0.86 | (0.74, 1.01) | 0.075 |
| HCC135 | Acute renal failure                                                         | 1.06 | (0.96, 1.16) | 0.252 |
| HCC158 | Pressure ulcer of skin with full thickness skin loss                        | 1.15 | (0.99, 1.34) | 0.069 |
| HCC170 | Hip fracture/dislocation                                                    | 1.12 | (0.95, 1.33) | 0.167 |

<sup>a</sup>0–25% PIP as baseline; <sup>b</sup>minimal or minor DDI as baseline; <sup>c</sup>female as baseline. Significance was set at  $p < 0.05$ . Variables shown were determined by least absolute shrinkage and selection operator analysis, which can vary by cohort subgroup. ZTNB: zero-truncated negative binomial; PIP: pharmacogenomic interaction probability; DDI: drug-drug interaction; RAF: risk adjustment factor; I-SNP: institutional special needs plan.

**Table S10.** Distribution of patients by chronic condition subpopulation, pharmacogenomic risk, and drug-drug interaction risk.

| Condition Group | Patient Count (%) | No. of patients by PIP |            |      | No. of patients by DDI |                                     |
|-----------------|-------------------|------------------------|------------|------|------------------------|-------------------------------------|
|                 |                   | ≤25%                   | 26% to 50% | >50% | Minimal or minor       | Moderate, major, or contraindicated |
| Hypertension    | 1902 (31.6)       | 984                    | 620        | 298  | 887                    | 1015                                |
| Hyperlipidemia  | 3499 (58.1)       | 1964                   | 1078       | 457  | 1779                   | 1720                                |
| Diabetes        | 3104 (51.5)       | 1675                   | 983        | 446  | 1525                   | 1579                                |
| COPD            | 1450 (24.1)       | 804                    | 440        | 206  | 598                    | 852                                 |

PIP: pharmacogenomic interaction probability; DDI: drug-drug interaction; COPD: chronic obstructive pulmonary disease.

**Table S11.** Expected length-of-stay ratios in the ZTNB regression model for patients with chronic obstructive pulmonary disease.

| Variable                  | Description | Ratio | 95% C.I.      | p-value |
|---------------------------|-------------|-------|---------------|---------|
| (Intercept)               | Intercept   | 5.31  | (2.76, 10.24) | < 0.001 |
| Moderate PIP <sup>a</sup> | 26% to 50%  | 1.13  | (1.03, 1.24)  | 0.009   |
| High PIP <sup>a</sup>     | >50%        | 1.18  | (1.05, 1.34)  | 0.006   |

|                                    |                                                                             |       |                |        |
|------------------------------------|-----------------------------------------------------------------------------|-------|----------------|--------|
|                                    |                                                                             |       |                |        |
| DDI Category 1 <sup>b</sup>        | Moderate, major, or contraindicated                                         | 1.01  | (0.93, 1.10)   | 0.796  |
| Hypertension                       | Hypertension flag                                                           | 1.05  | (0.96, 1.15)   | 0.318  |
| Hyperlipidemia                     | Hyperlipidemia flag                                                         | 1.07  | (0.98, 1.16)   | 0.122  |
| Diabetes                           | Diabetes flag                                                               | 0.95  | (0.87, 1.04)   | 0.248  |
| Age                                | Age of a patient (2019)                                                     | 1.006 | (1.001, 1.010) | 0.010  |
| Income                             | Median household income per ZCTA level (standardized)                       | 1.04  | (1.00, 1.09)   | 0.058  |
| RAF Score                          | Risk adjustment factor score                                                | 1.01  | (0.98, 1.04)   | 0.603  |
| Gender <sup>c</sup>                | Gender of a patient                                                         | 1.10  | (1.01, 1.20)   | 0.028  |
| Race/ethnicity Code 1 <sup>d</sup> | White (non-Hispanic)                                                        | 1.40  | (0.80, 2.45)   | 0.233  |
| Race/ethnicity Code 2 <sup>d</sup> | Black (non-Hispanic)                                                        | 1.32  | (0.76, 2.32)   | 0.325  |
| Race/ethnicity Code 3 <sup>d</sup> | Other                                                                       | 1.37  | (0.71, 2.61)   | 0.346  |
| Race/ethnicity Code 4 <sup>d</sup> | Asian/Pacific Islander                                                      | 1.14  | (0.58, 2.21)   | 0.705  |
| Race/ethnicity Code 5 <sup>d</sup> | Hispanic/Latino                                                             | 1.14  | (0.61, 2.13)   | 0.689  |
| I-SNP                              | Enrolled for at least one month in the institutional special needs plan     | 0.71  | (0.64, 0.77)   | <0.001 |
| HCC009                             | Lung and other severe cancers                                               | 0.70  | (0.55, 0.89)   | 0.003  |
| HCC027                             | End-stage liver disease                                                     | 1.68  | (1.12, 2.51)   | 0.011  |
| HCC028                             | Cirrhosis of liver                                                          | 0.73  | (0.50, 1.05)   | 0.086  |
| HCC039                             | Bone/joint/muscle infections/necrosis                                       | 1.11  | (0.89, 1.37)   | 0.352  |
| HCC046                             | Severe hematological disorders                                              | 0.75  | (0.49, 1.15)   | 0.183  |
| HCC047                             | Disorders of immunity                                                       | 0.76  | (0.58, 0.99)   | 0.038  |
| HCC048                             | Coagulation defects and other specified hematological disorders             | 1.11  | (0.97, 1.28)   | 0.134  |
| HCC054                             | Substance use with psychotic complications                                  | 1.75  | (1.07, 2.86)   | 0.026  |
| HCC055                             | Substance use disorder, moderate/severe or substance use with complications | 1.15  | (0.96, 1.38)   | 0.131  |

|        |                                                      |      |              |       |
|--------|------------------------------------------------------|------|--------------|-------|
| HCC057 | Schizophrenia                                        | 1.27 | (1.07, 1.52) | 0.007 |
| HCC077 | Multiple sclerosis                                   | 1.35 | (1.00, 1.84) | 0.053 |
| HCC084 | Cardio-respiratory failure and shock                 | 1.07 | (0.96, 1.20) | 0.227 |
| HCC104 | Monoplegia, other paralytic syndromes                | 0.34 | (0.16, 0.70) | 0.003 |
| HCC112 | Fibrosis of lung and other chronic lung disorders    | 0.60 | (0.40, 0.91) | 0.017 |
| HCC114 | Aspiration and specified bacterial pneumonias        | 1.02 | (0.86, 1.21) | 0.834 |
| HCC135 | Acute renal failure                                  | 1.03 | (0.92, 1.16) | 0.566 |
| HCC158 | Pressure ulcer of skin with full thickness skin loss | 1.12 | (0.92, 1.35) | 0.262 |
| HCC167 | Major head injury                                    | 1.55 | (1.10, 2.19) | 0.013 |
| HCC170 | Hip fracture/dislocation                             | 1.12 | (0.91, 1.37) | 0.280 |

<sup>a</sup>0–25% as baseline; <sup>b</sup>minimal or minor as baseline; <sup>c</sup>female as baseline; <sup>d</sup>unknown race/ethnicity as baseline. Significance was set at  $p < 0.05$ . ZTNB: zero-truncated negative binomial; PIP: pharmacogenomic interaction probability; DDI: drug–drug interaction; COPD: chronic obstructive pulmonary disease; RAF: risk adjustment factor; I-SNP: institutional special needs plan.

**Table S12.** Expected length-of-stay ratios in the ZTNB regression model for patients with diabetes.

| Variable                    | Description                                                             | Ratio | 95% C.I.       | <i>p</i> -value |
|-----------------------------|-------------------------------------------------------------------------|-------|----------------|-----------------|
| (Intercept)                 | Intercept                                                               | 8.45  | (6.60, 10.80)  | <0.001          |
| Moderate PIP <sup>a</sup>   | 26% to 50%                                                              | 1.05  | (0.99, 1.12)   | 0.119           |
| High PIP <sup>a</sup>       | >50%                                                                    | 1.15  | (1.05, 1.25)   | 0.002           |
| DDI Category 1 <sup>b</sup> | Moderate, major, or contraindicated                                     | 1.07  | (1.01, 1.13)   | 0.031           |
| Hypertension                | Hypertension flag                                                       | 0.98  | (0.91, 1.04)   | 0.440           |
| Hyperlipidemia              | Hyperlipidemia flag                                                     | 0.98  | (0.92, 1.04)   | 0.544           |
| COPD                        | COPD flag                                                               | 0.98  | (0.92, 1.06)   | 0.649           |
| Age                         | Age of a patient (2019)                                                 | 1.004 | (1.001, 1.007) | 0.008           |
| Income                      | Median household income per ZCTA level (standardized)                   | 1.08  | (1.05, 1.11)   | <0.001          |
| RAF Score                   | Risk adjustment factor score                                            | 1.03  | (1.00, 1.05)   | 0.033           |
| Gender <sup>c</sup>         | Gender of a patient                                                     | 1.08  | (1.01, 1.14)   | 0.016           |
| D-SNP                       | Enrolled for at least one month in the dual-eligible special needs plan | 0.91  | (0.81, 1.03)   | 0.144           |

|        |                                                                             |      |              |        |
|--------|-----------------------------------------------------------------------------|------|--------------|--------|
| I-SNP  | Enrolled for at least one month in the institutional special needs plan     | 0.72 | (0.67, 0.77) | <0.001 |
| HCC009 | Lung and other severe cancers                                               | 0.70 | (0.55, 0.88) | 0.003  |
| HCC010 | Lymphoma and other cancers                                                  | 1.25 | (0.99, 1.57) | 0.056  |
| HCC017 | Diabetes with acute complications                                           | 0.85 | (0.72, 1.02) | 0.075  |
| HCC023 | Other significant endocrine and metabolic disorders                         | 0.94 | (0.84, 1.05) | 0.266  |
| HCC027 | End-stage liver disease                                                     | 1.32 | (0.94, 1.83) | 0.106  |
| HCC033 | Intestinal obstruction/perforation                                          | 1.07 | (0.91, 1.26) | 0.436  |
| HCC035 | Inflammatory bowel disease                                                  | 1.20 | (0.91, 1.58) | 0.191  |
| HCC039 | Bone/joint/muscle infections/necrosis                                       | 1.10 | (0.94, 1.29) | 0.217  |
| HCC046 | Severe hematological disorders                                              | 0.75 | (0.55, 1.03) | 0.071  |
| HCC048 | Coagulation defects and other specified hematological disorders             | 1.07 | (0.96, 1.20) | 0.214  |
| HCC055 | Substance use disorder, moderate/severe or substance use with complications | 1.18 | (0.99, 1.42) | 0.072  |
| HCC072 | Spinal cord disorders/injuries                                              | 1.25 | (0.93, 1.68) | 0.141  |
| HCC077 | Multiple sclerosis                                                          | 1.33 | (1.04, 1.69) | 0.022  |
| HCC082 | Respirator dependence/ tracheostomy status                                  | 1.32 | (0.97, 1.79) | 0.078  |
| HCC099 | Cerebral hemorrhage                                                         | 1.24 | (0.98, 1.57) | 0.073  |
| HCC103 | Hemiplegia/hemiparesis                                                      | 1.07 | (0.96, 1.19) | 0.211  |
| HCC107 | Vascular disease with complications                                         | 1.10 | (0.95, 1.26) | 0.208  |
| HCC134 | Dialysis status                                                             | 0.87 | (0.75, 1.02) | 0.081  |
| HCC135 | Acute renal failure                                                         | 1.02 | (0.93, 1.11) | 0.733  |
| HCC161 | Chronic ulcer of skin, except pressure                                      | 1.11 | (0.99, 1.24) | 0.077  |

<sup>a</sup>0–25% PIP as baseline; <sup>b</sup>minimal or minor DDI as baseline; <sup>c</sup>female as baseline. Significance was set at  $p < 0.05$ . ZTNB: zero-truncated negative binomial; PIP: pharmacogenomic interaction probability; DDI: drug-drug interaction; COPD: chronic obstructive pulmonary disease; RAF: risk adjustment factor; I-SNP: institutional special needs plan.

**Table S13.** Expected length-of-stay ratios in the ZTNB regression model for patients with hyperlipidemia.

| Variable                    | Description                                                                 | Ratio | 95% C.I.       | p-value |
|-----------------------------|-----------------------------------------------------------------------------|-------|----------------|---------|
| (Intercept)                 | Intercept                                                                   | 6.46  | (5.06, 8.24)   | <0.001  |
| Moderate PIP <sup>a</sup>   | 26% to 50%                                                                  | 1.08  | (1.02, 1.15)   | 0.013   |
| High PIP <sup>a</sup>       | >50%                                                                        | 1.12  | (1.02, 1.22)   | 0.014   |
| DDI Category 1 <sup>b</sup> | Moderate, major, or contraindicated                                         | 1.05  | (0.99, 1.11)   | 0.096   |
| Hypertension                | Hypertension flag                                                           | 1.02  | (0.96, 1.08)   | 0.585   |
| Diabetes                    | Diabetes flag                                                               | 1.00  | (0.94, 1.06)   | 0.974   |
| COPD                        | COPD flag                                                                   | 1.05  | (0.98, 1.12)   | 0.209   |
| Age                         | Age of a patient (2019)                                                     | 1.007 | (1.004, 1.010) | <0.001  |
| Income                      | Median household income per ZCTA level (standardized)                       | 1.07  | (1.04, 1.10)   | <0.001  |
| RAF Score                   | Risk adjustment factor score                                                | 1.03  | (1.00, 1.05)   | 0.027   |
| Gender <sup>c</sup>         | Gender of a patient                                                         | 1.06  | (1.00, 1.12)   | 0.068   |
| I-SNP                       | Enrolled for at least one month in the institutional special needs plan     | 0.75  | (0.71, 0.80)   | <0.001  |
| HCC009                      | Lung and other severe cancers                                               | 0.74  | (0.58, 0.94)   | 0.015   |
| HCC023                      | Other significant endocrine and metabolic disorders                         | 0.87  | (0.77, 0.97)   | 0.017   |
| HCC028                      | Cirrhosis of liver                                                          | 0.72  | (0.51, 1.01)   | 0.059   |
| HCC046                      | Severe hematological disorders                                              | 0.62  | (0.45, 0.86)   | 0.004   |
| HCC055                      | Substance use disorder, moderate/severe or substance use with complications | 1.18  | (1.01, 1.39)   | 0.038   |
| HCC058                      | Reactive and unspecified psychosis                                          | 1.07  | (0.98, 1.15)   | 0.123   |
| HCC072                      | Spinal cord disorders/injuries                                              | 1.15  | (0.88, 1.51)   | 0.307   |
| HCC077                      | Multiple sclerosis                                                          | 1.33  | (1.04, 1.69)   | 0.022   |
| HCC082                      | Respirator dependence/ tracheostomy status                                  | 1.51  | (1.11, 2.07)   | 0.009   |
| HCC084                      | Cardio-respiratory failure and shock                                        | 1.07  | (0.97, 1.19)   | 0.184   |
| HCC099                      | Cerebral hemorrhage                                                         | 1.15  | (0.89, 1.48)   | 0.284   |
| HCC104                      | Monoplegia, other paralytic syndromes                                       | 0.58  | (0.36, 0.94)   | 0.027   |

|        |                                                   |      |              |       |
|--------|---------------------------------------------------|------|--------------|-------|
| HCC112 | Fibrosis of lung and other chronic lung disorders | 0.78 | (0.56, 1.07) | 0.125 |
| HCC167 | Major head injury                                 | 1.06 | (0.84, 1.35) | 0.618 |
| HCC170 | Hip fracture/dislocation                          | 1.22 | (1.03, 1.45) | 0.022 |

<sup>a</sup>0–25% PIP as baseline; <sup>b</sup>minimal or minor DDI as baseline; <sup>c</sup>female as baseline. Significance was set at  $p < 0.05$ . ZTNB: zero-truncated negative binomial; PIP: pharmacogenomic interaction probability; DDI: drug-drug interaction; COPD: chronic obstructive pulmonary disease; RAF: risk adjustment factor; I-SNP: institutional special needs plan.

**Table S14.** Expected length-of-stay ratios in the ZTNB regression model for patients with hypertension.

| Variable                    | Description                                                             | Ratio | 95% C.I.       | <i>p</i> -value |
|-----------------------------|-------------------------------------------------------------------------|-------|----------------|-----------------|
| (Intercept)                 | Intercept                                                               | 12.45 | (11.24, 13.79) | <0.001          |
| Moderate PIP <sup>a</sup>   | 26% to 50%                                                              | 1.03  | (0.95, 1.12)   | 0.478           |
| High PIP <sup>a</sup>       | >50%                                                                    | 1.22  | (1.10, 1.35)   | <0.001          |
| DDI Category 1 <sup>b</sup> | Moderate, major, or contraindicated                                     | 1.02  | (0.95, 1.10)   | 0.522           |
| Hyperlipidemia              | Hyperlipidemia flag                                                     | 1.02  | (0.95, 1.10)   | 0.617           |
| Diabetes                    | Diabetes flag                                                           | 0.93  | (0.86, 1.00)   | 0.058           |
| COPD                        | COPD flag                                                               | 1.04  | (0.95, 1.13)   | 0.403           |
| Income                      | Median household income per ZCTA level (standardized)                   | 1.08  | (1.04, 1.11)   | <0.001          |
| RAF Score                   | Risk adjustment factor score                                            | 1.01  | (0.99, 1.04)   | 0.321           |
| I-SNP                       | Enrolled for at least one month in the institutional special needs plan | 0.73  | (0.68, 0.79)   | <0.001          |
| HCC039                      | Bone/joint/muscle infections/necrosis                                   | 1.17  | (0.98, 1.40)   | 0.091           |
| HCC084                      | Cardio-respiratory failure and shock                                    | 1.08  | (0.97, 1.21)   | 0.148           |
| HCC135                      | Acute renal failure                                                     | 1.07  | (0.97, 1.17)   | 0.175           |

<sup>a</sup>0–25% PIP as baseline; <sup>b</sup>minimal or minor DDI as baseline. Significance was set at  $p < 0.05$ . ZTNB: zero-truncated negative binomial; PIP: pharmacogenomic interaction probability; DDI: drug-drug interaction; COPD: chronic obstructive pulmonary disease; RAF: risk adjustment factor; I-SNP: institutional special needs plan.
